# Supplementary material for: Real-world time trends in overall survival, treatments and patient characteristics in HR+/HER2− metastatic breast cancer: an observational study of the SONABRE Registry
Source: PubMed Central journal article supplement — Lancet Reg Health Eur. 2023 Jan 6;26:100573. doi: 10.1016/j.lanepe.2022.100573 (PMC9989628; doi:10.1016/j.lanepe.2022.100573), 2023-01-06
Supplement: mmc1.pdf [file mmc1.pdf]

**Supplementary Table 1.** Patient characteristics at time of advanced breast cancer diagnosis for patients with metachronous metastases, in total and per period of diagnosis.

| Characteristics            | Total<br>(n=1503) | 2008-2010<br>(n=362) | 2011-2013<br>(n=399) | 2014-2016<br>(n=366) | 2017-2019<br>(n=376) | p-value for<br>Trend |
|----------------------------|-------------------|----------------------|----------------------|----------------------|----------------------|----------------------|
| Sex                        |                   |                      |                      |                      |                      | 0.33                 |
| Female                     | 1489 (99)         | 358 (99)             | 394 (99)             | 363 (99)             | 374 (100)            |                      |
| Age (in years)             |                   |                      |                      |                      |                      | 0.04                 |
| Median (range)             |                   |                      |                      |                      |                      |                      |
| <70 years                  | 888 (59)          | 227 (63)             | 247 (62)             | 215 (59)             | 199 (53)             |                      |
| ≥70 years                  | 615 (41)          | 135 (37)             | 152 (38)             | 151 (41)             | 177 (47)             |                      |
| WHO status                 |                   |                      |                      |                      |                      | <0.001               |
| 0-1                        | 923 (83)          | 122 (88)             | 245 (82)             | 256 (82)             | 300 (83)             |                      |
| 2-4                        | 184 (17)          | 16 (12)              | 53 (17)              | 55 (18)              | 60 (17)              |                      |
| Unknown                    | 396               | 224                  | 101                  | 55                   | 16                   |                      |
| Comorbidities              |                   |                      |                      |                      |                      | <0.001               |
| Any                        | 890 (59)          | 189 (52)             | 231 (58)             | 233 (64)             | 237 (63)             |                      |
| Histology                  |                   |                      |                      |                      |                      | 0.152                |
| Ductal                     | 1087 (72)         | 260 (72)             | 291 (73)             | 256 (70)             | 280 (75)             |                      |
| Lobular                    | 317 (21)          | 73 (20)              | 88 (22)              | 85 (23)              | 71 (19)              |                      |
| Other/unknown              | 99 (7)            | 29 (8)               | 20 (5)               | 25 (7)               | 25 (7)               |                      |
| MFI                        |                   |                      |                      |                      |                      | 0.07                 |
| 3-60 months                | 510 (34)          | 147 (41)             | 117 (29)             | 120 (33)             | 126 (34)             |                      |
| 60-120 months              | 443 (30)          | 101 (28)             | 122 (31)             | 119 (33)             | 101 (27)             |                      |
| >120 months                | 550 (37)          | 114 (32)             | 160 (40)             | 127 (35)             | 149 (40)             |                      |
| Number of metastatic sites |                   |                      |                      |                      |                      | 0.002                |
| Single                     | 680 (45)          | 183 (51)             | 193 (48)             | 148 (40)             | 156 (42)             |                      |
| Multiple                   | 823 (55)          | 179 (49)             | 206 (52)             | 218 (60)             | 220 (59)             |                      |
| Sites of metastases        |                   |                      |                      |                      |                      |                      |
| Bones                      | 1120 (75)         | 272 (75)             | 307 (77)             | 262 (72)             | 279 (74)             | 0.41                 |
| Bone-only                  | 466 (31)          | 127 (35)             | 138 (35)             | 101 (28)             | 100 (27)             | 0.002                |
| Soft tissue <sup>a</sup>   | 507 (34)          | 104 (29)             | 116 (29)             | 140 (38)             | 147 (39)             | <0.001               |
| Visceral <sup>b</sup>      | 846 (56)          | 193 (53)             | 216 (54)             | 215 (59)             | 222 (59)             | 0.06                 |
| CNS <sup>c</sup>           | 57 (4)            | 17 (5)               | 13 (3)               | 15 (4)               | 12 (3)               | 0.42                 |

Data are given as number (%) unless otherwise indicated.

Abbreviations: ABC, advanced breast cancer; CNS, central nervous system; MFI, metastatic-free interval; WHO, World Health Organization

<sup>a</sup> Soft tissue, lymph nodes, skin and eye; <sup>b</sup> Liver, lung, pleura, peritoneum, gastrointestinal track, other; <sup>c</sup> Brain and leptomeningeal

**Supplementary Figure 1.** Graphs of the cumulative use of systemic therapies (A. Endocrine therapy, B. CDK4/6 inhibitors, C. mTOR-inhibitors, D. Chemotherapy) by period of diagnosis.

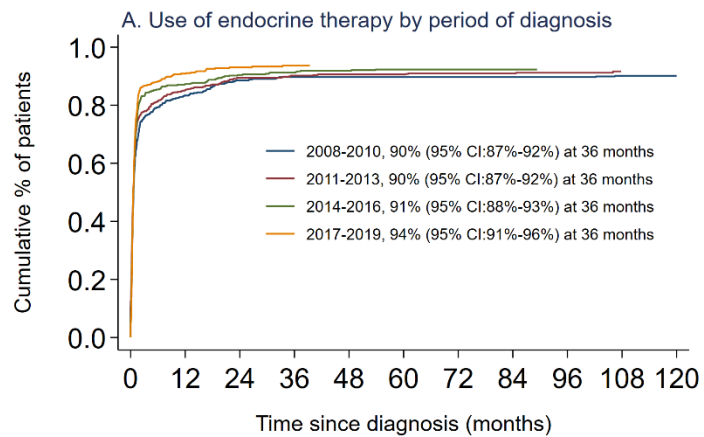

| Number at risk | 0   | 12 | 24 | 36 | 48 | 60 | 72 | 84 | 96 | 108 | 120 |
|----------------|-----|----|----|----|----|----|----|----|----|-----|-----|
| 2008-2010      | 456 | 58 | 22 | 9  | 8  | 6  | 6  | 6  | 6  | 4   | 3   |
| 2011-2013      | 521 | 55 | 20 | 14 | 12 | 9  | 6  | 6  | 3  | 0   | 0   |
| 2014-2016      | 480 | 47 | 20 | 13 | 9  | 6  | 4  | 1  | 0  | 0   | 0   |
| 2017-2019      | 493 | 26 | 8  | 3  | 0  | 0  | 0  | 0  | 0  | 0   | 0   |

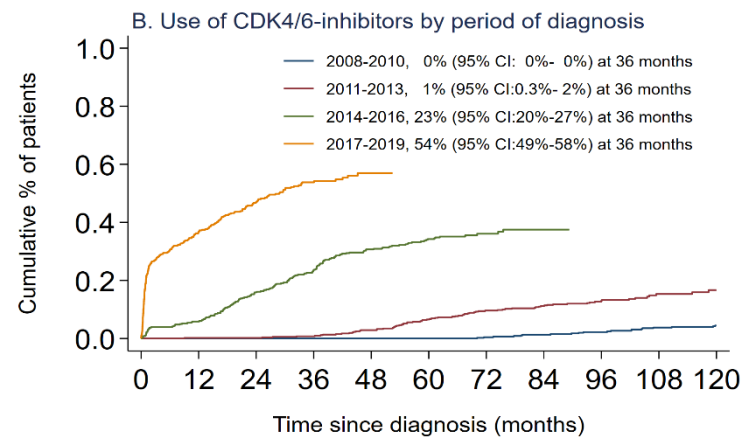

| Number at risk | 0   | 12  | 24  | 36  | 48  | 60  | 72 | 84 | 96 | 108 | 120 |
|----------------|-----|-----|-----|-----|-----|-----|----|----|----|-----|-----|
| 2008-2010      | 456 | 366 | 275 | 200 | 145 | 97  | 75 | 54 | 37 | 25  | 17  |
| 2011-2013      | 521 | 433 | 343 | 255 | 179 | 114 | 77 | 54 | 29 | 10  | 4   |
| 2014-2016      | 480 | 374 | 236 | 157 | 88  | 51  | 16 | 3  | 0  | 0   | 0   |
| 2017-2019      | 493 | 237 | 129 | 50  | 5   | 0   | 0  | 0  | 0  | 0   | 0   |

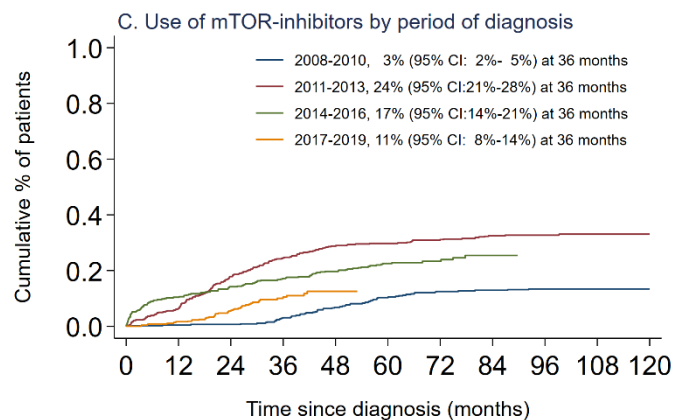

| Number at risk | 0   | 12  | 24  | 36  | 48  | 60 | 72 | 84 | 96 | 108 | 120 |
|----------------|-----|-----|-----|-----|-----|----|----|----|----|-----|-----|
| 2008-2010      | 456 | 364 | 274 | 191 | 125 | 73 | 50 | 41 | 32 | 26  | 21  |
| 2011-2013      | 521 | 405 | 272 | 184 | 124 | 93 | 77 | 60 | 36 | 13  | 8   |
| 2014-2016      | 480 | 358 | 259 | 191 | 137 | 80 | 30 | 6  | 0  | 0   | 0   |
| 2017-2019      | 493 | 382 | 252 | 99  | 11  | 0  | 0  | 0  | 0  | 0   | 0   |

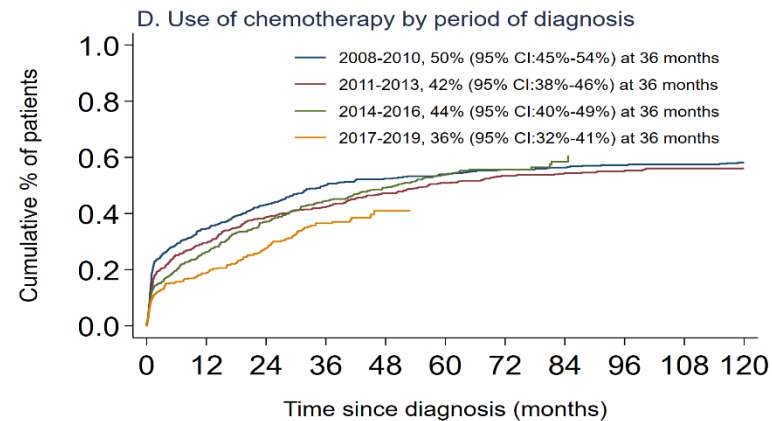

| Number at risk | 0   | 12  | 24  | 36  | 48  | 60 | 72 | 84 | 96 | 108 | 120 |
|----------------|-----|-----|-----|-----|-----|----|----|----|----|-----|-----|
| 2008-2010      | 456 | 243 | 173 | 121 | 87  | 64 | 45 | 37 | 28 | 23  | 15  |
| 2011-2013      | 521 | 317 | 228 | 180 | 122 | 83 | 65 | 52 | 28 | 12  | 8   |
| 2014-2016      | 480 | 306 | 215 | 159 | 112 | 57 | 21 | 3  | 0  | 0   | 0   |
| 2017-2019      | 493 | 332 | 205 | 73  | 9   | 0  | 0  | 0  | 0  | 0   | 0   |
